# Supplementary material for: Hierarchically porous single catalyst Ru/HPW/UiO-66 with synergistic acid/metal sites for one-pot catalytic synthesis of γ-valerolactone
Source: Royal Society of Chemistry journal article supplement (doi:10.1039/d2nj02266d), 2022-01-01
Supplement: d2nj02266d1.pdf [file d2nj02266d1.pdf]

## Supplementary Information

### **Hierarchically porous single catalyst Ru/HPW/UiO-66 with synergistic acid/metal sites for one-pot catalytic synthesis of $\gamma$ -Valerolactone**

Feng Xu,<sup>#a</sup> Chao Liu,<sup>#b</sup> Jia-Xin Li,<sup>b</sup> Cai-Zhen Zhan,<sup>b</sup> Qi-Ning Xun,<sup>a</sup> Wen-Shen Zhang,<sup>a</sup> Wen-Fang Xing,<sup>a</sup> Gang-Gang Chang<sup>\*b</sup>

<sup>a</sup> Shandong Institute of nonmetallic materials, the sixth scientific research department, No.3 Tianjiazhuang East Road, Jinan City, Shandong Province, 250031

<sup>b</sup> School of Chemistry, Chemical Engineering and Life Science & State Key Laboratory of Advanced Technology for Materials Synthesis and Processing, Wuhan University of Technology, 122, Luoshi Road, 430070, Wuhan, Hubei, China

**Table S1. Physicochemical properties of various Ru Catalysts.**

| Catalyst                  | $S_{\text{BET}}^{\text{a}}$ m <sup>2</sup> /g | $V_{\text{total}}^{\text{b}}$ cm <sup>3</sup> /g |
|---------------------------|-----------------------------------------------|--------------------------------------------------|
| UiO-66                    | 676.4                                         | 0.31                                             |
| HP-UiO-66                 | 720.7                                         | 0.74                                             |
| 0.14 wt% Ru/HPW/HP-UiO-66 | 508.0                                         | 0.52                                             |
| 0.83 wt% Ru/HPW/HP-UiO-66 | 322.5                                         | 0.29                                             |
| 1.40 wt% Ru/HPW/HP-UiO-66 | 295.2                                         | 0.27                                             |

<sup>a</sup> BET specific area; <sup>b</sup> Total pore volume.

**Table S2. Catalytic Performance of various Ru Catalysts in the Hydrogenation of methyl levulinate (ML)<sup>a</sup>**

| Entry | Catalyst                  | Conversion (%) | Selectivity (%) |                    |
|-------|---------------------------|----------------|-----------------|--------------------|
|       |                           |                | GVL             | other <sup>b</sup> |
| 1     | -                         | 28.6           | 0               | 100                |
| 2     | HP-UiO-66                 | 95.3           | 0               | 100                |
| 3     | Ru/HP-UiO-66              | 98.6           | 15.8            | 84.2               |
| 4     | Ru/HPW/UiO-66             | 100            | 30.2            | 69.8               |
| 5     | 0.14 wt% Ru/HPW/HP-UiO-66 | 97.5           | 37.4            | 62.6               |
| 6     | 0.83 wt% Ru/HPW/HP-UiO-66 | 97.1           | 100             | 0                  |
| 7     | 1.40 wt% Ru/HPW/HP-UiO-66 | 92.7           | 100             | 0                  |

<sup>a</sup> Reaction conditions unless specified otherwise: 8 mL of H<sub>2</sub>O, 80mg of ML, 20mg of catalyst, 1MPa of H<sub>2</sub>, 120°C, 12h;

<sup>b</sup> Byproducts mainly include  $\gamma$ -hydroxyvaleric acid, levulinic acid, and other unknown products.

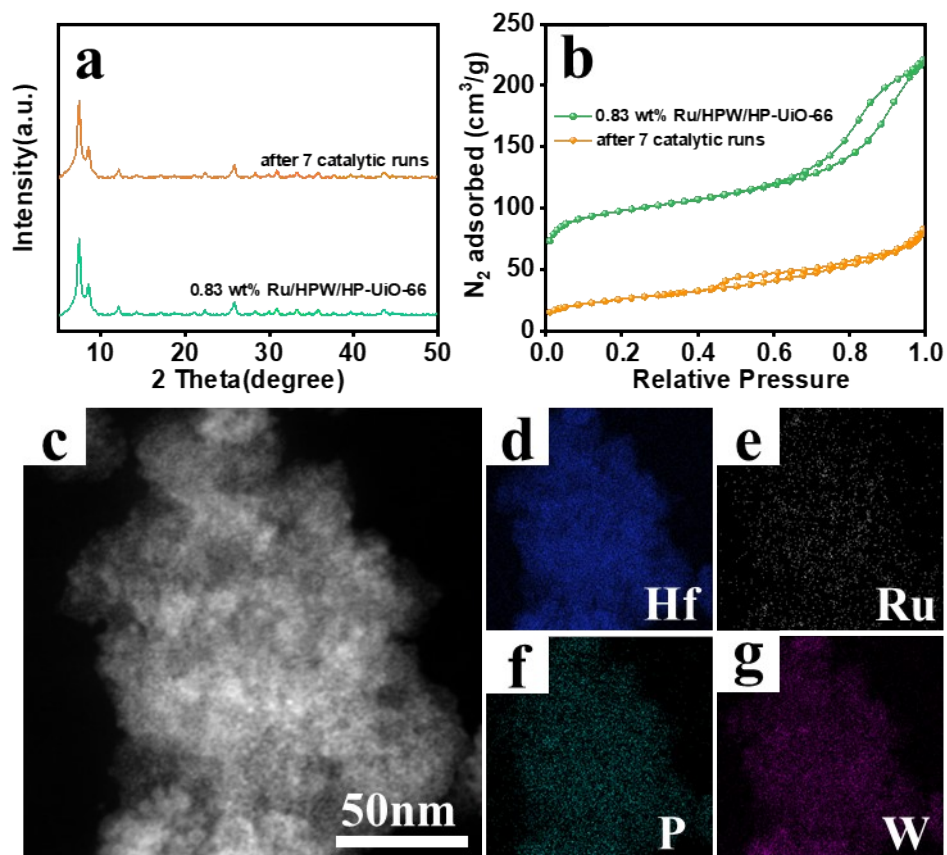

**Figure S1.** (a) XRD patterns, (b) N<sub>2</sub> adsorption-desorption isothermals, (c) TEM image and (d, e, f, g) corresponding EDX elemental mapping of 0.83 wt% Ru/HPW/HP-UiO-66 after 7 catalytic runs.
